# Supplementary material
Source: HighWire-hosted journal article supplement (https://www.jpn.ca/highwire/filestream/89455/field_highwire_adjunct_files/0/jpn-170041-1-at.pdf)
Supplement: jpn-170041-1-at.pdf [file jpn-170041-1-at.pdf]

**Appendix 1** to Islam AH, Metcalfe AW, MacIntosh BJ, et al. Greater body mass index is associated with reduced frontal cortical volumes among adolescents with bipolar disorder. *J Psychiatry Neurosci* 2017.

DOI: 10.1503/jpn.170041

Copyright © 2017 The Author(s) or their employer(s). To receive this resource in an accessible format, please contact us at [cmajgroup@cmaj.ca](mailto:cmajgroup@cmaj.ca).

*Online appendices are unedited and posted as supplied by the authors.*

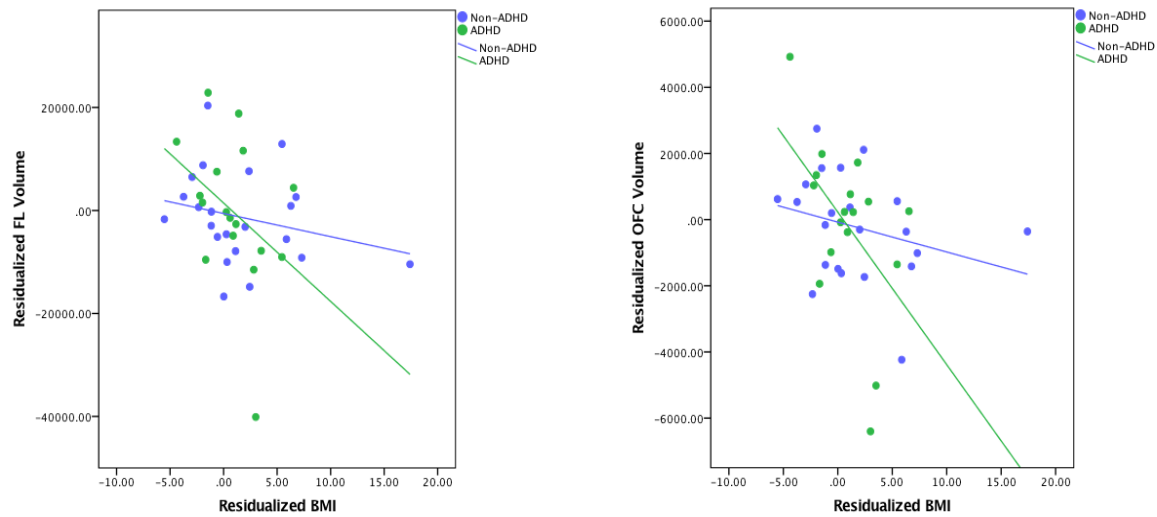

**Figure S1. ADHD-by-BMI interaction on frontal lobe (FL) volume and orbitofrontal cortex (OFC) volume, within BD group. S1a.** Scatterplot of residualized BMI vs. residualized orbital frontal lobe volume. **S1b.** Scatterplot of residualized BMI vs. residualized orbitofrontal cortex volume

**Appendix 1** to Islam AH, Metcalfe AW, MacIntosh BJ, et al. Greater body mass index is associated with reduced frontal cortical volumes among adolescents with bipolar disorder. *J Psychiatry Neurosci* 2017. DOI: 10.1503/jpn.170041

*Online appendices are unedited and posted as supplied by the authors.*

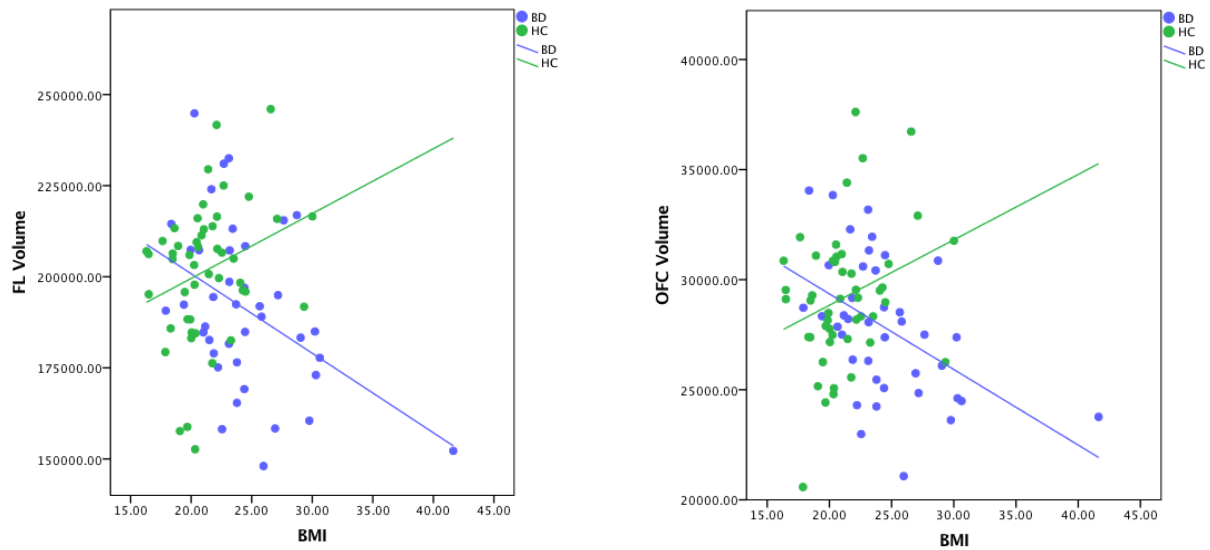

**Figure S2. Diagnosis-by-BMI interaction on frontal lobe (FL) volume and orbitofrontal cortex (OFC) volume. S2A.** Scatterplot of BMI vs. raw FL volume. **S2B.** Scatterplot of BMI vs. raw OFC volume.

**Appendix 1** to Islam AH, Metcalfe AW, MacIntosh BJ, et al. Greater body mass index is associated with reduced frontal cortical volumes among adolescents with bipolar disorder. *J Psychiatry Neurosci* 2017.  
DOI: 10.1503/jpn.170041

*Online appendices are unedited and posted as supplied by the authors.*

**Figure S3**

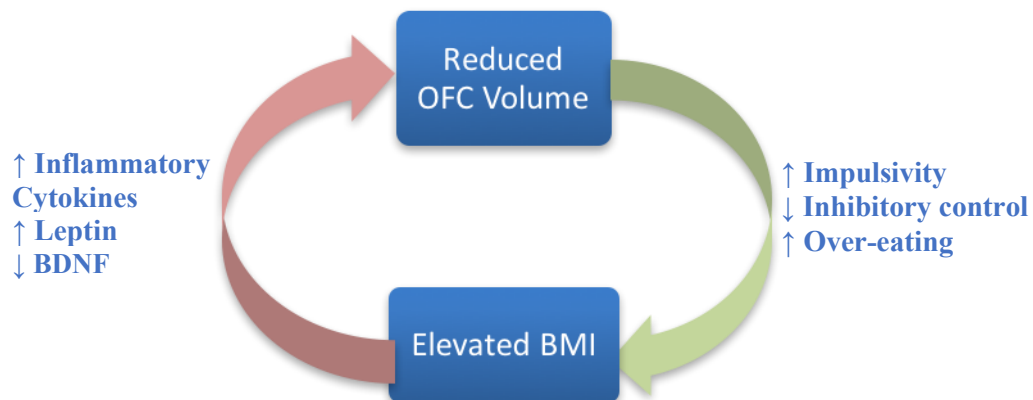

**Figure S3. Proposed bidirectional relationship between BMI and ROI volumes**
